# Supplementary material for: Functionalization of electrospun ceramic nanofibre membranes with noble-metal nanostructures for catalytic applications
Source: Royal Society of Chemistry journal article supplement (doi:10.1039/b901509d), 2009-01-01
Supplement: b901509d.pdf [file b901509d.pdf]

## Supporting Information

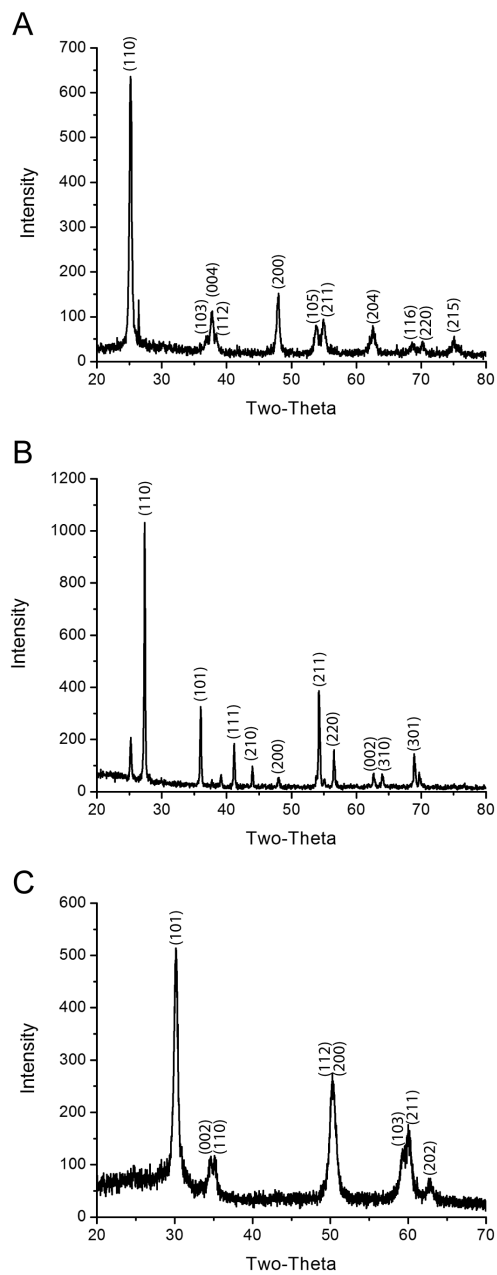

**Figure S1.** XRD of A) anatase fibres calcinated at 510 °C for 6 h; B) rutile fibres calcinated at 800 °C for 3 h; C) tetragonal ZrO<sub>2</sub> fibres calcinated at 550 °C for 6 h.

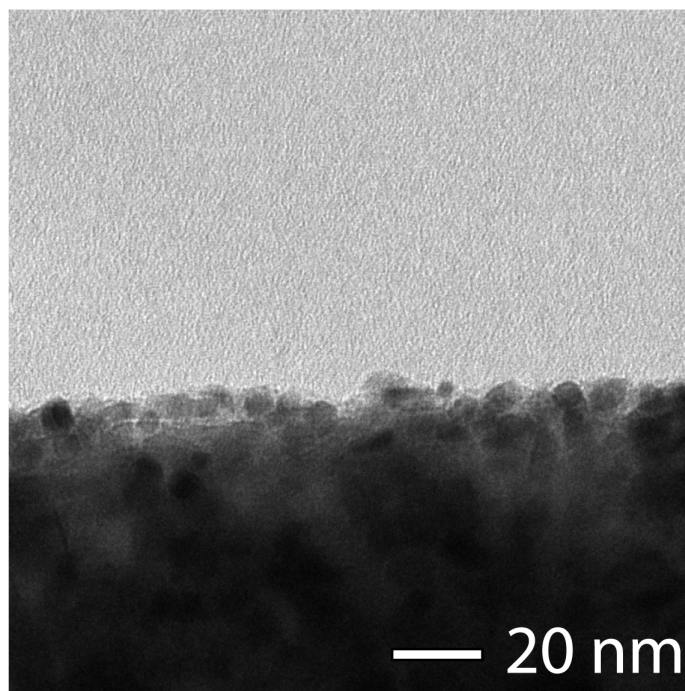

**Figure S2.** TEM image of the Pd-decorated anatase nanofibre following the coupling reaction and reactivation with 1 M nitric acid.
